# Supplementary material for: DiScRIBinATE: a rapid method for accurate taxonomic classification of metagenomic sequences
Source: PubMed Central journal article supplement (PMC2957682; doi:10.1186/1471-2105-11-s7-s14), 2010-10-15
Supplement: 1471-2105-11-S7-S14-S1.pdf [file 1471-2105-11-S7-S14-S1.pdf]

**Additional file 1: Table S1:** Comparison of the percentage of reads assigned under various bin categories by DiScRIBinATE (DI), SOrt-ITEMS (SI) and MEGAN (ME) for the (A) 454-100 datasets (B) 454-250 datasets (C) 454-400 datasets and (D) Sanger datasets.

(A) 454-100

| ASSIGNMENT CATEGORIES     | SPECIES UNKNOWN |      |      | GENUS UNKNOWN |      |      | FAMILY UNKNOWN |      |      |
|---------------------------|-----------------|------|------|---------------|------|------|----------------|------|------|
|                           | DI              | SI   | ME   | DI            | SI   | ME   | DI             | SI   | ME   |
| HIGHER LEVELS             | 7.9             | 3.5  | 5.8  | 9.8           | 5.2  | 7.7  | 10.3           | 11.2 | 8.2  |
| INTERMEDIATE LEVELS       | 20.3            | 15.4 | 7.3  | 19.4          | 10.1 | 8.3  | 16.0           | 11.7 | 7.2  |
| SPECIFIC LEVELS           | 20.3            | 22.9 | 14.0 | 3.9           | 5.1  | 2.2  | 0.0            | 0.0  | 0.0  |
| TOTAL CORRECT ASSIGNMENTS | 48.5            | 41.8 | 27.1 | 33.1          | 20.4 | 18.2 | 26.3           | 22.8 | 15.4 |
| WRONG                     | 0.4             | 1.7  | 12.1 | 0.7           | 3.9  | 7.3  | 1.0            | 4.4  | 4.1  |
| UNASSIGNED + NO HITS      | 51.1            | 56.6 | 60.8 | 66.2          | 75.7 | 74.4 | 72.7           | 72.8 | 80.6 |

(B) 454-250

| ASSIGNMENT CATEGORIES     | SPECIES UNKNOWN |      |      | GENUS UNKNOWN |      |      | FAMILY UNKNOWN |      |      |
|---------------------------|-----------------|------|------|---------------|------|------|----------------|------|------|
|                           | DI              | SI   | ME   | DI            | SI   | ME   | DI             | SI   | ME   |
| HIGHER LEVELS             | 4.9             | 6.0  | 10.8 | 11.6          | 10.5 | 19.0 | 13.3           | 11.5 | 18.8 |
| INTERMEDIATE LEVELS       | 37.1            | 31.7 | 14.2 | 38.0          | 35.4 | 19.4 | 33.7           | 25.9 | 16.8 |
| SPECIFIC LEVELS           | 30.4            | 31.9 | 25.9 | 6.4           | 6.2  | 5.3  | 0.0            | 0.0  | 0.0  |
| TOTAL CORRECT ASSIGNMENTS | 72.4            | 69.6 | 50.9 | 56.0          | 52.1 | 43.7 | 46.9           | 37.4 | 35.6 |
| WRONG                     | 1.1             | 3.1  | 25.6 | 3.1           | 7.8  | 17.8 | 4.7            | 11.7 | 12.6 |
| UNASSIGNED + NO HITS      | 26.4            | 27.3 | 23.4 | 40.9          | 40.2 | 38.5 | 48.4           | 50.9 | 47.5 |

(C) 454-400

| ASSIGNMENT CATEGORIES     | SPECIES UNKNOWN |      |      | GENUS UNKNOWN |      |      | FAMILY UNKNOWN |      |      |
|---------------------------|-----------------|------|------|---------------|------|------|----------------|------|------|
|                           | DI              | SI   | ME   | DI            | SI   | ME   | DI             | SI   | ME   |
| HIGHER LEVELS             | 8.2             | 7.3  | 11.3 | 18.0          | 13.9 | 21.9 | 23.2           | 17.4 | 28.6 |
| INTERMEDIATE LEVELS       | 42.3            | 38.8 | 14.2 | 48.4          | 44.4 | 23.5 | 42.4           | 36.9 | 22.8 |
| SPECIFIC LEVELS           | 34.7            | 36.4 | 31.0 | 8.1           | 8.1  | 6.7  | 0.0            | 0.0  | 0.0  |
| TOTAL CORRECT ASSIGNMENTS | 85.2            | 82.5 | 56.5 | 74.5          | 66.4 | 52.1 | 65.6           | 54.3 | 51.4 |
| WRONG                     | 1.4             | 4.0  | 29.3 | 3.8           | 9.7  | 22.7 | 7.5            | 14.0 | 18.8 |
| UNASSIGNED + NO HITS      | 13.4            | 13.6 | 14.1 | 21.6          | 23.9 | 25.1 | 26.9           | 31.7 | 29.9 |

(D) SANGER

| ASSIGNMENT CATEGORIES     | SPECIES UNKNOWN |      |      | GENUS UNKNOWN |      |      | FAMILY UNKNOWN |      |      |
|---------------------------|-----------------|------|------|---------------|------|------|----------------|------|------|
|                           | DI              | SI   | ME   | DI            | SI   | ME   | DI             | SI   | ME   |
| HIGHER LEVELS             | 4.6             | 4.7  | 9.7  | 11.1          | 15.7 | 20.2 | 11.1           | 12.8 | 30.3 |
| INTERMEDIATE LEVELS       | 56.3            | 45.3 | 16.0 | 64.4          | 54.2 | 30.6 | 70.1           | 50.8 | 22.2 |
| SPECIFIC LEVELS           | 29.2            | 31.6 | 40.0 | 5.7           | 6.1  | 8.4  | 0.0            | 0.0  | 0.0  |
| TOTAL CORRECT ASSIGNMENTS | 90.1            | 81.6 | 65.7 | 81.2          | 76.0 | 59.2 | 81.2           | 63.6 | 52.5 |
| WRONG                     | 1.3             | 2.7  | 31.4 | 3.7           | 5.9  | 29.2 | 3.7            | 8.2  | 35.3 |
| UNASSIGNED + NO HITS      | 8.6             | 15.8 | 2.9  | 15.1          | 18.2 | 11.6 | 15.1           | 28.3 | 12.2 |

'Species Unknown', 'Genus Unknown' and 'Family Unknown' refer to the database variants used. A detailed description of the database variants is given in the Results section of the manuscript. Note that the subtotals may vary by a value of 0.1, since the individual values are rounded off to single decimals.
